# Supplementary material for: Gene regulation underlies environmental adaptation in house mice
Source: HighWire-hosted journal article supplement (doi:10.1101/gr.238998.118), 2018-09-07
Supplement: Supplemental_File_S1.xlsx [file Supplemental_File_S1.xlsx]

## Sheet: Samples
RNAseq library ID	Total paired-end reads	Exome available	Exome_name	Population	Sex	Latitude	Longitude	Weight (g)	Body length	Tail length	MVZ collection number
MNKM01-19	22763662	x	MWNMVP001_108B	FL	F	29.6745	-82.3309	13	152	75	MVZ:Mamm:230591
MNKM01-40	22586734	x	MWNMVP001_115B	FL	F	29.4522	-82.3403	14	169	85	MVZ:Mamm:230595
MNKM01-38	23317619	x	MWNMVP003_113B	FL	F	29.7869	-82.4959	11.375	166	82	MVZ:Mamm:230590
MNKM01-39	22832690	x	MWNMVP003_114B	FL	F	29.3728	-82.1989	15.5	169	85	MVZ:Mamm:230603
MNKM01-37	20020894	o	N/A	FL	F	29.6233	-82.3403	15.5	165	75	MVZ:Mamm:230602
MNKM01-41	20918299	o	N/A	FL	F	29.7151	-82.3535	11.125	148	80	MVZ:Mamm:230592
MNKM01-20	22881622	x	MWNMVP001_110B	FL	M	29.6233	-82.3403	15.5	155	75	MVZ:Mamm:230601
MNKM01-21	23859048	x	MWNMVP003_112B	FL	M	29.7789	-82.417	12.75	155	78	MVZ:Mamm:230593
MNKM01-22	21282505	x	MWNMVP001_124B	GA	F	34.1001	-83.597	14.5	156	78	MVZ:Mamm:230604
MNKM01-26	21622386	x	MWNMVP001_131B	GA	F	33.8858	-83.4802	9	137	72	MVZ:Mamm:230613
MNKM01-44	25589934	x	MWNMVP001_132B	GA	F	33.8437	-83.3374	11	150.5	75	MVZ:Mamm:230614
MNKM01-45	26619846	x	MWNMVP001_133B	GA	F	33.9464	-83.3838	21.375	172	83	MVZ:Mamm:230607
MNKM01-1	19493130	x	MWNMVP002_130B	GA	F	33.9464	-83.3838	16.125	168	88	MVZ:Mamm:230610
MNKM01-24	21672742	o	N/A	GA	F	33.8702	-83.2889	9.25	132	67	MVZ:Mamm:230605
MNKM01-42	23991999	x	MWNMVP002_128B	GA	M	33.8702	-83.2889	15.75	154	73	MVZ:Mamm:230606
MNKM01-23	19518681	x	MWNMVP003_125B	GA	M	34.0989	-83.3454	11	137	68	MVZ:Mamm:230609
MNKM01-25	20390379	x	MWNMVP003_129B	GA	M	33.8376	-83.3505	12.75	142	65	MVZ:Mamm:230615
MNKM01-35	17966584	x	MWNMVP002_137B	NH	F	43.998	-72.1045	13.375	152	71	MVZ:Mamm:230619
MNKM01-46	17332301	x	MWNMVP003_134B	NH	F	44.112	-72.0454	19.125	172	89	MVZ:Mamm:230616
MNKM01-47	20210398	x	MWNMVP003_135B	NH	F	44.1121	-72.0455	21.375	178	85	MVZ:Mamm:230617
MNKM01-27	23395660	o	N/A	NH	F	43.9728	-72.0939	11	138	65	MVZ:Mamm:230620
MNKM01-28	24047882	x	MWNMVP001_138B	NH	M	43.9719	-72.0846	14.75	168	82	MVZ:Mamm:230622
MNKM01-29	28345482	x	MWNMVP003_140B	NH	M	43.9728	-72.0939	14	151	77	MVZ:Mamm:230621
MNKM01-2	17352744	o	N/A	NH	M	44.1763	-71.9468	8.25	127	65	MVZ:Mamm:230618
MNKM01-5	19432607	x	MWNMVP001_150B	PA	F	40.5957	-75.6589	11.875	155	80	MVZ:Mamm:230631
MNKM01-34	25573291	x	MWNMVP001_156B	PA	F	40.5267	-76.0973	21	186	90	MVZ:Mamm:230625
MNKM01-32	23554459	x	MWNMVP002_153B	PA	F	40.5004	-76.1034	21.25	164	82.5	MVZ:Mamm:230624
MNKM01-30	20901497	x	MWNMVP003_146B	PA	F	40.6188	-75.3636	13.125	163	77	MVZ:Mamm:230633
MNKM01-43	25900940	o	N/A	PA	F	40.5957	-75.6589	18.25	136	48	MVZ:Mamm:230630
MNKM01-6	17287456	x	MWNMVP001_148B	PA	M	40.451	-75.4013	13.25	161	86	MVZ:Mamm:230628
MNKM01-31	21911678	x	MWNMVP001_151B	PA	M	40.5519	-75.3246	15	161	82.5	MVZ:Mamm:230634
MNKM01-7	20851704	x	MWNMVP001_152B	PA	M	40.5311	-75.3474	15	162	81	MVZ:Mamm:230629
MNKM01-33	21092965	x	MWNMVP002_155B	PA	M	40.7075	-75.6674	14.5	158	80	MVZ:Mamm:230632
MNKM01-8	23279255	o	N/A	PA	M	40.5281	-76.1017	17.125	160	81	MVZ:Mamm:230626
MNKM01-50	26688759	x	MWNMVP002_159B	VA	F	37.7412	-77.5755	14.75	155	78	MVZ:Mamm:230641
MNKM01-11	26578804	x	MWNMVP002_161B	VA	F	37.6553	-77.7293	15.25	156	76	MVZ:Mamm:230638
MNKM01-16	24201235	x	MWNMVP002_167B	VA	F	37.5276	-77.6227	13	153	73	MVZ:Mamm:230635
MNKM01-18	25556592	x	MWNMVP002_169B	VA	F	37.5554	-77.6615	11	143	74	MVZ:Mamm:230636
MNKM01-10	34337800	o	N/A	VA	F	37.7044	-77.4028	16	161	81	MVZ:Mamm:230601
MNKM01-12	29132390	x	MWNMVP002_162B	VA	M	37.4876	-77.4021	17.25	177	91	MVZ:Mamm:230645
MNKM01-13	26448119	x	MWNMVP002_163B	VA	M	37.655	-77.7398	15.125	153	75	MVZ:Mamm:230637
MNKM01-14	22718724	x	MWNMVP002_164B	VA	M	37.6788	-77.5166	18.25	184	93	MVZ:Mamm:230642
MNKM01-15	24825633	x	MWNMVP002_165B	VA	M	37.5581	-77.4807	10.75	151	85	MVZ:Mamm:230644
MNKM01-17	29852262	x	MWNMVP002_166B	VA	M	37.7606	-77.4835	15	157	77	MVZ:Mamm:230639
MNKM01-9	21356562	o	N/A	VA	M	37.5535	-77.474	7.75	128	62	MVZ:Mamm:230643
MNKM01-49	21010748	x	MWNMVP003_142B	VT	F	43.9609	-72.1158	23.75	187	93	MVZ:Mamm:230649
MNKM01-4	16979629	x	MWNMVP003_145B	VT	F	43.956	-72.1116	21	178	80	MVZ:Mamm:230650
MNKM01-36	22859352	x	MWNMVP001_143B	VT	M	43.9279	-72.123	15.5	161.5	80	MVZ:Mamm:230647
MNKM01-3	15642579	x	MWNMVP001_144B	VT	M	44.1281	-72.0433	18.25	170	82.5	MVZ:Mamm:230651
MNKM01-48	30041884	x	MWNMVP003_141B	VT	M	43.9507	-72.1175	19.5	146	60	MVZ:Mamm:230648
