# Supplementary material for: Gene regulation underlies environmental adaptation in house mice
Source: HighWire-hosted journal article supplement (doi:10.1101/gr.238998.118), 2018-09-07
Supplement: Supplemental_Material_and_Methods_.docx [file Supplemental_Material_and_Methods_.docx]

**Supplemental material and methods**

Table of contents

1. Supplementary Methods…………………………………………………………………….……….. 2
   1. Sampling…………………………………….………………………………………………….… 2
   2. mRNA-sequencing and library preparation……………………………………….. 2
   3. Quantifying gene expression…………………………………………………………….. 2
   4. Exome capture sequencing and identification of clinal outliers………...... 3
   5. Variant calling on exome and RNA-seq data………………………………………. 4
   6. *cis*-eQTL discovery with GEMMA………………………………………………………. 5
   7. Identifying allele-specific expression………………………………………………… 6
   8. Associations between body mass and candidate genes………………………. 6
   9. Differential expression……………………………………………………………………… 7
   10. Characterizing linkage disequilibrium……………………………………………….. 7
   11. Weighted gene co-expression analysis………………………………………………. 7
   12. Replication of the Adam17 *cis-*eQTL in European populations………….… 8
2. Supplementary Literature Cited…………………………………………………………………... 9
3. Supplementary Tables…………………………………………………………………………….…. 12
4. Supplementary Figures………………………………………………………………………....…… 21

**Supplemental methods**

***Sampling***

Mice were collected from 5 sampling localities in the eastern United States (see Supplemental File S1 for individual localities). Museum specimens were prepared (skin and skull) and have been deposited in the U.C. Berkeley Museum of Vertebrate Zoology (Phifer-Rixey et al. 2018)(see File S1)*.* At least 10 individuals were collected at each location. Individuals were collected at a minimum of 500 meters apart from one another to avoid collecting closely related individuals. Sex and reproductive status were assessed and recorded at the time of collection. Body weight, total body length, tail length, hindfoot length, and ear length were measured and recorded for each individual. Animals were sacrificed in accordance with IACUC protocols and tissues (liver, kidney, heart and spleen) were collected and stored at -80°C. Liver tissue was also collected in RNAlater and stored at 4oC overnight and then frozen to -80oC until subsequent RNA extraction.

***mRNA-sequencing and library preparation***

RNA was extracted with Qiagen’s RNeasy Mini Kit, and the extracted RNA from each sample was quantified with a Qubit spectrophotometer. RNA libraries were built with KAPA’s stranded mRNA-Seq kit and were sequenced at UC Berkeley’s Vincent J. Coates Genomics Sequencing Laboratory. For each sample, 100 base-pair paired-end reads were sequenced on the Illumina HiSeq4000 platform across 3 lanes.

***Quantifying gene expression***

RNA-seq reads were trimmed with Trimmomatic (Bolger et al. 2014) and mapped with TopHat2 (Kim et al. 2013) to personal reference genomes (see “*Variant calling on exome and RNA-seq data”* for methods of constructing personalized references), allowing two mismatches. Mapping bias toward the reference allele can reduce the accuracy of allele-specific expression measurements. We attempted to mitigate the effects of mapping bias by (1) allowing mismatches during mapping, which has been shown to reduce reference bias (Stevenson et al. 2013), and (2) creating and mapping RNA-seq reads to personal reference genomes for each individual. While only heterozygous sites were tested for allele-specific expression, indels were masked in our personal reference genomes, as these have been shown to cause biased allele-specific assignment (Stevenson et al. 2013). We found that creating personalized reference genomes also increased the number of reads mapped overall. Additionally, when looking at sites for which we find significant allele-specific expression, we found no bias in the number of reads mapped towards the reference for these sites.

We achieved an average of 1.7G of mapped reads per sample. Reads that did not map uniquely were discarded. We used HTseq-count (Anders and Huber 2015) to count reads overlapping exons to estimate mRNA abundance per gene. Read counts were subsequently quantile normalized to account for differences in sequencing depth between libraries. Information on the read depth per sample is available in Supplemental File S1.

***Exome capture sequencing and identification of clinal outliers***

DNA was extracted from tissues from 50 individuals using the Qiagen Gentra Puregene Kit. Forty-one of these individuals have matched RNA-seq libraries (see Table S1). Libraries were prepared with unique barcodes for each individual and a NimbleGen in-solution capture kit (SeqCap EZ Mouse) was used to enrich libraries for exonic target regions. Individuals were pooled in groups of 16-17 and each 100-bp paired-end reads were sequenced for each pool on one lane of Illumina HiSeq2000. Sequence data were cleaned to remove adaptor sequences, filter out low-complexity reads, bacterial contamination, and PCR duplicates. Overlapping reads were merged. Reads were subsequently mapped with Bowtie 2 (Langmead and Salzberg 2012) to the C57BL/6J (GRCm38) mouse reference genome. Average coverage per site was approximately ~15×.

Allele frequencies at variable sites were estimated with the program ANGSD (Korneliussen et al. 2014). Individual sites were filtered based on (1) the posterior probability of an individual’s genotype (>=0.50), (2) the *p*-value for the likelihood ratio test for the SNP being variable (<=0.001), and (3) minor allele frequency (>5%), resulting in a total of 281,361 sites that could be tested for clinal associations.

Clinal outliers were identified using the program LFMM (Frichot et al. 2013) using latitude as an environmental correlate. LFMM implements a Bayesian PCA to simultaneously infer background population structure and identify covariance between environmental and genetic variation.

Fifty runs of LFMM with 2 latent factors (-K 2) and 50,000 burnin cycles in the Gibbs sampler algorithm (-b 50000) were performed to obtain z-scores for each SNP. The median z-score for a variant was taken across all runs.

While isolation by distance can alternatively explain clinal patterns of variation, there is no evidence for isolation by distance for these populations. Principle component analyses on genotypes (Figure S19) and on expression (Figure S20) also do not cluster individuals based on latitude. Thus, clinal patterns are not a consequence of isolation by distance.

***Variant calling on exome and RNA-seq data***

Variant calling was performed with Genome Analysis Toolkit v3.6 (GATK) HaplotypeCaller (McKenna et al. 2010). After marking duplicate reads, we performed the Base Quality Recalibration using high quality variant calls for *Mus musculus* downloaded from the Wellcome Trust (ftp://ftp-mouse. sanger.ac.uk/current_snps). We then performed joint genotyping on exome data with HaplotypeCaller followed by Variant Quality Score Recalibration using the Wellcome Trust variant calls and a recently published variant call set from natural populations of *Mus musculus* (Harr et al. 2016). As joint genotyping is not recommended for RNA-seq reads, we performed variant calling separately on each of these samples with HaplotypeCaller. We then filtered variants based on variant confidence (if QD < 2.0), strand bias (if FS > 30.0), mapping quality, (if MQRankSum < -12.5 and if MQ < 35.0), and bias in read position (ReadPosRankSum < -8.0). Additionally, we excluded sites where fewer than 5 reads supported the genotype call. These genotype and indel calls were used to create personal reference genomes for each sample. Variant calls were inserted into the mouse reference (GRCm38) and indels were masked using bedtools (Quinlan and Hall 2010).

***cis-eQTL discovery with GEMMA***

To control for population structure, hidden factors, and sex, expression levels were corrected with the program PEER (Stegle et al. 2010, Stegle et al. 2012), which uses a Bayesian approach to infer determinants using a factor analysis method. Population structure was accounted for by including the first 6 principle components from the genotype data, which accounted for a combined 24.18% of variation. Principal component analysis was performed using the package SNPRelate (Zheng et al. 2012).

The program GEMMA (Zhou et al. 2012) was used to identify putative *cis-* regulatory variation for autosomal genes. Sex chromosomes were excluded from the analysis. Linear mixed model approaches have demonstrated success in controlling for relatedness among samples and controlling for population stratification (e.g., Kang et al. 2008, Listgarten et al. 2010, Price et al. 2010, Zhang et al. 2010). While mice were collected for this study in a way to minimize the sampling of closely related individuals, individuals show different levels of relatedness. To account for this, a centered relatedness matrix was computed by GEMMA based on the input genotypes and included as a covariant.

GEMMA fits a linear mixed model in the following form:

where *y* represents a *n*-vector of qualitative traits for *n* individuals, *W* is a *n × c* matrix of covariates, α is a c-vector of the corresponding coefficients including the intercept, *x* is an n-vector of genotypes, *β* is the effect size, *u* is a vector of random effects, *𝜖* is an n-vector of errors and τ-1 is the variance of residual errors, λ represents is the ratio between the two variance components, *K* represents the *n* × *n* relatedness matrix, *I*n is a n × n identity matrix, and finally MVNis multivariate normal distribution. In this case, *y* is an n by 1 vector of gene expression residuals for n individuals, *x* is the n by 1 vector of genotypes, and *u* is an n by 1 vector to control for relatedness and population structure, and represents residual errors as an n × 1 vector. We test the alternative hypothesis *H1 : β* ≠ 0 against *H0*: *β* = 0 for each variant within 200-kb of the gene of interest. The 200-kb distance was based on thresholds used in other studies to identify *cis*-eQTL (Pickrell et al. 2010, Sun 2012, Sun and Wu 2013, Tung et al. 2015). Sites with 1) a minor allele frequencies less than 0.01, 2) Hardy-Weinberg *p*-values below 0.001, or 3) Missing genotype calls for 10 or more individuals, were excluded from the *cis*-eQTL analysis.

Missing genotypes were imputed with BEAGLE (Browning and Browning 2009). The 9 individuals for which we had no exome data and only RNA-seq reads show a high rate of missing genotypes compared to other samples because of reduced coverage in some regions. Consequently, when missing genotypes were imputed using BEAGLE for these samples, we found that they clustered together in a group in a PCA (where these samples cluster with their source population when genotypes are not imputed; Figure S19). As a result, we only performed imputation for the 41 individuals for which we had exome-sequence in the *cis*-eQTL mapping analysis, and not for the individuals without matched exome libraries, and then subsequently mapped *cis-*eQTL using this set of variants.

***Identifying allele-specific expression***

To identify allele-specific expression, we focused on exonic heterozygous sites where both the reference and alternative allele were supported by more than 10 reads. To test for allele-specific expression, we considered a beta-binomial distribution to model allelic counts. We estimate dispersion by setting the likelihood at *p*=0.5 (assuming no allelic imbalance) and varying the dispersion parameter from 0 and 1 to minimize the likelihood function. This dispersion parameter was then used to estimate the beta binomial maximum likelihood. For each gene in a given individual, we took the site with the lowest *p*-value and performed a false discovery rate correction.

***Associations between body mass and candidate genes***

All statistical analyses of body mass associations were performed in R (v3.3.2) using individuals of both sexes. To account for co-variation between latitude and body mass, body mass was first adjusted for latitude with linear regression and subsequently tested for correlations with the expression of genes in Table 1. Sex is not a significant predictor for body mass in these data (Table S9) and the relationship between *Adam17* and *Bcat2* expression and body mass was significant whether or not individuals were excluded based on reproductive status (see Table S6). Associations between *Bcat2* and *Adam17* expression and body mass without adjustments for latitude are available in Figure S6. SNP contributions to the phenotypic variance were estimated using an ANOVA model after adjusting body mass for latitude, the first eigenvector of SNPs to control for population structure, their interaction, and sex using a linear regression.

***Differential expression***

We used the R package DESeq2 (Love et al. 2014) to identify differential expression between populations at the latitudinal extremes. We tested 13,635 genes for differential expression between 8 individuals from Florida and 12 individuals from New Hampshire and Vermont. We used DESeq2 to normalize raw gene read counts, estimate dispersion factors for each gene, and then test for differential expression based on a negative binomial distribution (Figure S4). The resulting *p*-values were then false discovery rate corrected.

***Characterizing linkage disequilibrium***

To characterize linkage disequilibrium (LD) in this dataset,we used PLINK v1.9 (Chang et al. 2015) to calculate squared inter-variant allele count correlations (*r*2), normalized measure of allelic association (D’), and to create LD blocks (following the definition of haplotype block from [Gabriel et al. 2002]). We restricted the LD analysis to SNPs with a minor allele frequency greater than 0.01 (see Figure S5).

***Weighted gene co-expression analysis***

We performed weighted gene co-expression analysis (WGCNA) following WGCNA protocols (Langfelder and Horvath 2008) on non-pregnant females (n=19) and males (n=21). One male outlier was filtered based on sample clustering. Pearson’s correlations for all gene pairs across samples were calculated to create similarity matrices. Soft thresholding power was selected based on scale-free topology. The minimum module size was set to 30 genes. We assigned 13,636 genes to 47 expression modules in male mice and 13,635 genes to 40 expression modules in female mice. Male-female consensus modules were also created to identify co-expression patterns shared across sexes. Across males and females, we identified 44 expression modules comprising 9,359 genes. We tested for associations between a summary profile (called an eigengene) and external traits (BMI, tail length, body mass, and latitude) to identify modules associated with these external traits (Figure S15,S16,S17).

***Replication of the Adam17 cis-eQTL in European populations***

SNP calls and liver RNA-seq reads (mapped to mm10) from Harr et al. 2016 were retrieved (http://wwwuser.gwdg.de/~evolbio/evolgen/wildmouse/) for mice from Germany (n=8) and France (n=8) (Harr et al. 2016). To quantify gene expression, we used HTseq-count (Anders and Huber 2015) to count reads overlapping exons. Reads overlapping exonic regions were subsequently quantile normalized. The SNP identified as a *cis*-eQTL for *Adam17* (Chr12:21332631) in Eastern North America was found to be significantly correlated with *Adam17* expression in European mice. We were unable to validate the *Bcat2* cis-eQTL in European individuals as 11/16 individuals were fixed for the reference allele.

**Supplementary Literature Cited**

Anders S, Pyl PT, Huber W. 2015. HTSeq—a Python framework to work with high-throughput sequencing data. *Bioinformatics* 31:166-169.

Bolger AM, Lohse M, Usadel B. 2014. Trimmomatic: A flexible trimmer for Illumina Sequence Data. *Bioinformatics* 30: 2114–2120

Browning BL, Browning SR. 2009. A unified approach to genotype imputation and haplotype-phase inference for large data sets of trios and unrelated individuals. *Am J Hum Genet* 84:210-223.

Chang CC, Chow CC, Tellier LCAM, Vattikuti S, Purcell SM, Lee JJ. 2015. Second-generation PLINK: rising to the challenge of larger and richer datasets. *GigaScience* 4:7.

Frichot E, Schoville SD, Bouchard G, François O. 2013. Testing for associations between loci and environmental gradients using latent factor mixed models. *Mol Biol Evol* 30: 1687-1699.

Gabriel SB, Schaffner SF, Nguyen H, Moore JM, Roy J, Blumenstiel B, Higgins J, DeFelice M, Lochner A, Faggart M, Liu-Cordero SN. 2002. The structure of haplotype blocks in the human genome. *Science* 296:2225-2229.

Harr B, Karakoc E, Neme R, Teschke M, Pfeifle C, Pezer Ž, Babiker H, Linnenbrink M, Montero I, Scavetta R, Abai MR. 2016. Genomic resources for wild populations of the house mouse, Mus musculus and its close relative *Mus spretus. Sci Data* 3:160075.

Kang HM, Zaitlen NA, Wade CM, Kirby A, Heckerman D, Daly MJ, Eskin E. 2008. Efficient control of population structure in model organism association mapping. *Genetics* 178:1709-1723.

Kim D, Pertea G, Trapnell C, Pimentel H, Kelley R, Salzberg SL. 2013. TopHat2: accurate alignment of transcriptomes in the presence of insertions, deletions and gene fusions. *Genome Biol* 14:R36.

Korneliussen TS, Albrechtsen A, Nielsen R. 2014. ANGSD: analysis of next generation sequencing data. *BMC Bioinformatics* 15: 356.

Langmead B, Salzberg SL. 2012. Fast gapped-read alignment with Bowtie 2. *Nat Methods* 9: 357-359.

Listgarten J, Kadie C, Schadt EE, Heckerman D. 2010. Correction for hidden confounders in the genetic analysis of gene expression. *Proc Natl Acad Sci USA* 107:16465–16470.

Love MI, Huber W, Anders S. 2014. Moderated estimation of fold change and dispersion for RNA-seq data with DESeq2. *Genome Biol* 15:550.

McKenna A, Hanna M, Banks E, Sivachenko A, Cibulskis K, Kernytsky A, *et al*. 2010. The Genome Analysis Toolkit: a MapReduce framework for analyzing next-generation DNA sequencing data. *Genome Res* 20: 1297-1303.

Phifer-Rixey M, Bi K, Ferris KG, Sheehan MJ, Lin D, Mack KL, Keeble SM, Suzuki TA, Good JM, Nachman MW. 2018. The genomic basis of environmental adaptation in house mice. *PLoS Genet* 14: e1007672.

Pickrell JK, Marioni JC, Pai AA, Degner JF, Engelhardt BE, Nkadori E, Veyrieras JB, Stephens M, Gilad Y, Pritchard JK. 2010. Understanding mechanisms underlying human gene expression variation with RNA sequencing. *Nature* 464: 768–772.

Price AL, Zaitlen NA, Reich D, Patterson N. 2010. New approaches to population stratification in genome-wide association studies. *Nat Rev Genet* 11: 459–463.

Quinlan AR, Hall IM. 2010. BEDTools: a flexible suite of utilities for comparing genomic features. *Bioinformatics* 26: 841-842.

Stegle O, Parts L, Durbin R, Winn J. 2010. A Bayesian framework to account for complex non-genetic factors in gene expression levels greatly increases power in eQTL studies. *PLoS Comput Biol* 6: e1000770.

Stegle O, Parts L, Piipari M, Winn J, Durbin R. 2012. Using probabilistic estimation of expression residuals (PEER) to obtain increased power and interpretability of gene expression analyses. *Nat Protoc* 7:500-507.

Stevenson KR, Coolon JD, Wittkopp PJ. 2013. Sources of bias in measures of allele-specific expression derived from RNA-seq data aligned to a single reference genome. *BMC Genomics* 14:536.

Sun W. 2012. A statistical framework for eQTL mapping using RNA‐seq data. *Biometrics* 68:1-11.

Sun W, Hu Y. 2014. Mapping of Expression Quantitative Trait Loci Using RNA-seq Data. In *Statistical Analysis of Next Generation Sequencing Data* (pp. 145-168). Springer, Cham.

Tung J, Zhou X, Alberts SC, Stephens M, Gilad Y. 2015. The genetic architecture of gene expression levels in wild baboons. *eLife* 4: e04729.

Zhang Z, Ersoz E, Lai CQ, Todhunter RJ, Tiwari HK, Gore MA, Bradbury PJ, Yu J, Arnett DK, Ordovas JM, Buckler ES. 2010. Mixed linear model approach adapted for genome-wide association studies. *Nature Genet* 42: 355-360.

Zheng X, Levine D, Shen J, Gogarten S, Laurie C and Weir B. 2012. A High-performance Computing Toolset for Relatedness and Principal Component Analysis of SNP Data. *Bioinformatics* 28: 3326-3328.

Zhou X, Stephens M. 2012. Genome-wide efficient mixed-model analysis for association studies. *Nature Genet* 44: 821-824.

Langfelder P, Horvath S. 2008. WGCNA: an R package for weighted correlation network analysis. *BMC Bioinformatics* 9: 559.

**Supplemental tables**

**Table S1.** Summary of samples used in this study (further metadata is available in File S1)

| RNA-seq library ID | Exome available | Exome name | Population | Sex |
| --- | --- | --- | --- | --- |
| MNKM01-19 | x | MWNMVP001_108B | FL | F |
| MNKM01-40 | x | MWNMVP001_115B | FL | F |
| MNKM01-38 | x | MWNMVP003_113B | FL | F |
| MNKM01-39 | x | MWNMVP003_114B | FL | F |
| MNKM01-37 | o | N/A | FL | F |
| MNKM01-41 | o | N/A | FL | F |
| MNKM01-20 | x | MWNMVP001_110B | FL | M |
| MNKM01-21 | x | MWNMVP003_112B | FL | M |
| MNKM01-22 | x | MWNMVP001_124B | GA | F |
| MNKM01-26 | x | MWNMVP001_131B | GA | F |
| MNKM01-44 | x | MWNMVP001_132B | GA | F |
| MNKM01-45 | x | MWNMVP001_133B | GA | F |
| MNKM01-1 | x | MWNMVP002_130B | GA | F |
| MNKM01-24 | o | N/A | GA | F |
| MNKM01-42 | x | MWNMVP002_128B | GA | M |
| MNKM01-23 | x | MWNMVP003_125B | GA | M |
| MNKM01-25 | x | MWNMVP003_129B | GA | M |
| MNKM01-35 | x | MWNMVP002_137B | NH | F |
| MNKM01-46 | x | MWNMVP003_134B | NH | F |
| MNKM01-47 | x | MWNMVP003_135B | NH | F |
| MNKM01-27 | o | N/A | NH | F |
| MNKM01-28 | x | MWNMVP001_138B | NH | M |
| MNKM01-29 | x | MWNMVP003_140B | NH | M |
| MNKM01-2 | o | N/A | NH | M |
| MNKM01-5 | x | MWNMVP001_150B | PA | F |
| MNKM01-34 | x | MWNMVP001_156B | PA | F |
| MNKM01-32 | x | MWNMVP002_153B | PA | F |
| MNKM01-30 | x | MWNMVP003_146B | PA | F |
| MNKM01-43 | o | N/A | PA | F |
| MNKM01-6 | x | MWNMVP001_148B | PA | M |
| MNKM01-31 | x | MWNMVP001_151B | PA | M |
| MNKM01-7 | x | MWNMVP001_152B | PA | M |
| MNKM01-33 | x | MWNMVP002_155B | PA | M |
| MNKM01-8 | o | N/A | PA | M |
| MNKM01-50 | x | MWNMVP002_159B | VA | F |
| MNKM01-11 | x | MWNMVP002_161B | VA | F |
| MNKM01-16 | x | MWNMVP002_167B | VA | F |
| MNKM01-18 | x | MWNMVP002_169B | VA | F |
| MNKM01-10 | o | N/A | VA | F |
| MNKM01-12 | x | MWNMVP002_162B | VA | M |
| MNKM01-13 | x | MWNMVP002_163B | VA | M |
| MNKM01-14 | x | MWNMVP002_164B | VA | M |
| MNKM01-15 | x | MWNMVP002_165B | VA | M |
| MNKM01-17 | x | MWNMVP002_166B | VA | M |
| MNKM01-9 | o | N/A | VA | M |
| MNKM01-49 | x | MWNMVP003_142B | VT | F |
| MNKM01-4 | x | MWNMVP003_145B | VT | F |
| MNKM01-36 | x | MWNMVP001_143B | VT | M |
| MNKM01-3 | x | MWNMVP001_144B | VT | M |
| MNKM01-48 | x | MWNMVP003_141B | VT | M |

**Table S2.** Testing for allele-specific expression in wild mice

|  | Number |
| --- | --- |
| Heterozygous sites1 | 28,234 |
| Genes tested | 6,738 |
| Genes with ASE | 442 |
| Genes with ASE in >1 individual  Genes with ASE and a *cis*-eQTL | 258  40 |

1Heterozygous sites within exons with sufficient read depth to test for ASE

2*q-*value < 0.05

**Table S3.** Differential expression between latitudinal extremes (FL vs. NH/VT)

|  | Number of genes |
| --- | --- |
| Genes with differential expression | 458 |
| Genes with differential expression  and a *cis*-eQTL1 | 48 |
| Genes with differential expression and allele-specific expression1 | 14 |

1*q*-value < 0.05

**Table S4.** Candidate gene *cis-*eQTL (Table 1) states and allele frequencies

| Gene | Reference1 | Alternative | Ancestral2 | Major | Minor | Minor allele frequency |
| --- | --- | --- | --- | --- | --- | --- |
| *Tcea1* | T | A | N/A | A | T | 0.49 |
| *Iah1* | T | C | C | C | T | 0.48 |
| *Lnx1* | T | C | C | T | C | 0.31 |
| *2810402E24Rik* | A | C | C | A | C | 0.26 |
| *Arl6ip4* | G | A | G | G | A | 0.32 |
| *Nsa2* | T | C | T | C | T | 0.38 |
| *Rpl3* | G | G | A | G | A | 0.26 |
| *Bcat2* | T | C | C | C | T | 0.17 |
| *1810024B03Rik* | A | G | N/A | A | G | 0.49 |
| *Rplp0* | A | G | N/A | A | G | 0.42 |
| *Rpap2* | T | C | T | T | C | 0.43 |
| *F11* | A | G | G | G | A | 0.45 |
| *Hmgb1* | G | A | N/A | G | A | 0.33 |
| *Adam17* | T | C | C | T | C | 0.49 |
| *Cox7c* | G | A | G | G | A | 0.28 |
| *Ccdc137* | T | C | C | T | C | 0.43 |
| *Nsfl1c* | A | G | G | A | G | 0.31 |

1Reference allele based on mm10

2Ancestral allele based on *Mus spretus* (SPRET/EiJ) alignment

**Table S5.** *cis*-eQTL that within an LD block of a clinal outlier that are also differentially expressed between Florida and New York

| Symbol | Log2 Fold Change | *q*-value | Phenotypes |
| --- | --- | --- | --- |
| *Hmgb1* | 0.65 | 0.0026 | behavior, cellular, growth/size/body, homeostasis, mortality/aging, respiratory, vision/eye, endocrine/exocrine |
| *Lnx1* | -1.39 | 0.0037 | hematopoietic, immune |
| *Ccdc137* | 0.73 | 0.0097 | hematopoietic, immune |
| *Bcat2* | 0.69 | 0.015 | adipose, behavior, growth/size/body, homeostasis, renal/urinary |
| *2810402E24Rik* | 0.91 | 0.021 |  |
| *Cox19* | -0.76 | 0.048 |  |
| *AA465934* | -0.92 | 0.048 |  |
| *F11* | 0.62 | 0.0084 | hematopoietic, homeostasis, nervous system |
| *Iah1* | -0.76 | 0.062 | cardiovascular, limbs/digits/tail, skeleton |
| *Oasl1* | -0.95 | 0.032 | homeostasis, immune, mortality/aging |
| *Tcea1* | 0.63 | 0.095 | cardiovascular, embryo, growth/size/body, hematopoietic, homeostasis, limbs/digits/tail, liver/biliary, mortality/aging |

**Table S6.** Association between *Adam17* and *Bcat2* expression and body mass ware significant whether or not females assessed as pregnant were excluded.

|  | *Adam17* expression vs. body mass residuals | *Bcat2* expression vs. body mass residuals |
| --- | --- | --- |
| Sample | *p*-value | *p*-value |
| All Individuals | **4.6E-04** | **0.0041** |
| Non-pregnant individuals | **8.3E-04** | **0.041** |

**Table S7.** Genes within body size associated co-expression modules that are associated with a cis-eQTL that co-localizes with aLFMM outlier.

| Gene name | | Z Score |1 |
| --- | --- |
| Females |  |
| *Ube2q2* | 3.04 |
| *3110082I17Rik* | 2.28 |
| *Cep85* | 3.01 |
| *Bcat2* | 2.19 |
| *F830016B08Rik* | 2.02 |
| *Rpl3* | 2.98 |
| *Iah1* | 2.13 |
| *Dhdh* | 2.47 |
| *Cib1* | 2.15 |
| *2810402E24Rik* | 2.03 |
| *Zc3h6* | 2.07 |
| Males |  |
| *Pygb* | 2.42 |
| *Ccdc137* | 2.93 |
| *Nsun3* | 2.01 |
| *Pgghg* | 2.15 |

1LFMM |Z Score|

**Table S8**. The average proportion of bases with coverage within an individual

|  | Average proportion of bases with coverage in one individual |
| --- | --- |
| Genes surveyed | 0.32 |
| 200-kb surrounding genes surveyed | 0.15 |

**Table S9.** Analysis of body size. A linear model was fit in the following form: Body mass (g) ~ Sex + Latitude (N=50).

| Response | Predictor | P value |
| --- | --- | --- |
| Body Mass | Sex | 0.46 |
|  | Latitude | **0.018** |

**Supplemental Figures**

**Figure S1**. The locations of SNPs identified as *cis*-eQTL. RefSeq exon annotations were used to annotate the locations of cis-eQTL. Some genes are annotated to multiple elements (e.g., within an exon and intron) and are represented in multiple categories.

**Figure S2.** Allele-specific expression and *cis*-eQTL detection is more likely in genes when SNP density is higher (Wilcoxon test, *p*=3.1e-11 and *p*< 2.2e-16, respectively).

**Figure S3.** Allele-specific expression detection is more likely in genes with higher expression (Wilcoxon test, *p*-value < 2.2e-16).

**Figure S4.** Differential expression between latitudinal extremes. We compared gene expression between wild collected mice in Florida and mice collected from New Hampshire and Vermont.

**Figure S5.** Average correlation (*r*2) between variants against physical distance (in kb) for SNPs with a minor allele frequency greater than 0.01.

**Figure S6.** A. Correlation between *Adam17* expression and body mass without adjustment for latitude. B. Correlation between *Bcat2* expression and body mass without adjustment for latitude.

**Figure S7.** Correlations between *Adam17* and body mass in 5 populations. *Adam17* is significantly associated with body mass in one population (New Hampshire/Vermont, *p*=0.0035) and trends in the right direction in 4 of the 5 populations.

**Figure S8.** Correlations between *Bcat2* and body mass in 5 populations. *Bcat2* is significantly associated with body mass in two population (Pennsylvania and Georgia, *p*=0.03 and *p*= 0.0018, respectively) and trends in the right direction in 4 of the 5 populations.

**Figure S9.** *Cis-*eQTL for (A) *Adam17* and (B) *Bcat2* are associated with differences in body mass.

**Figure S10.** A.The *Adam17* *cis*-eQTL (Chr12:21332631) in Europe.B.The Adam17 *cis*-eQTL is correlated with the expression of *Adam17* in European individuals.

**Figure S11.** A. ADAM17 is a sheddase that is physiologically inhibited by TIMP3. B. *Timp3* expression is correlated with *Adam17* expression. C. *Timp3* is differentially expressed between the Florida and New Hampshire/Vermont populations.

**Figure S12**. The *Adam17* *cis*-eQTL is in LD with sites in a proximal promoter region. A. Average number of reads across individuals per site in exome data. B. *r*2 between the *Adam17 cis-*eQTL (in red) and proximal sites.

**Figure S13**. A. Average number of reads across individuals per site in low coverage whole genome data. B. *r*2 between the *Adam17 cis*-eQTL (in red) and proximal sites.

**Figure S14**. A. Two SNPs (Chr12:21373219 and Chr12:21373218) in the *Adam17* promoter (highlighted in grey) are clinal outliers. B. Clinal variation in allele frequencies at Chr12:21373218. C. Clinal variation in allele frequencies at Chr12:21373219.

**Figure S15**. Relationship between co-expression modules and external traits in male mice. Each number represents the correlation between the module eigengene and the external trait and in parentheses is the associated *p*-value.

**Figure S16**. Relationship between co-expression modules and external traits in female mice. Each number represents the correlation between the module eigengene and the external trait and in parentheses is the associated *p*-value.

**Figure S17**. Relationship between consensus co-expression modules between males and female mice and external traits. Each number represents the correlation between the module eigengene and the external trait and in parentheses is the associated *p*-value.

**Figure S18.** Co-expression modules with the top trait associations for female (A) and male (B) mice.

**Figure S19.** Principle-component analysis of genotype data from 50 individuals. Colors denote the population of origin.

**Figure S20.** Principle-component analysis of expression data from 50 individuals. Colors denote the population of origin.
